# Supplementary material for: Poor Compliance to Clinical Guidelines in the Diagnosis of Acute Appendicitis: Insights from a National Survey
Source: MDPI journal article supplement (doi:10.3390/jcm13102862), 2024-05-13
Supplement: s1 [file s1]

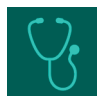

**Table S1.** Comparison between general surgery and emergency medicine residents.

| Question                                                                                                                     | Total Cohort<br>(n = 181) | General Surgery<br>Resident<br>(n = 161) | Emergency Medicine<br>Residents<br>(n = 20) | <i>p</i> -<br>value |
|------------------------------------------------------------------------------------------------------------------------------|---------------------------|------------------------------------------|---------------------------------------------|---------------------|
| What is the Alvarado score in this case?                                                                                     |                           |                                          |                                             |                     |
| Alvarado scores up to 7                                                                                                      | 29 (16%)                  | 26 (19%)                                 | 3 (16.7%)                                   | 0.999               |
| Alvarado above 7                                                                                                             | 126 (69.6.3%)             | 111 (81%)                                | 15 (83.3%)                                  |                     |
| What is the next recommended step in the guidelines?                                                                         |                           |                                          |                                             |                     |
| appendectomy                                                                                                                 | 147 (81.2%)               | 135 (84.4%)                              | 12 (57.1%)                                  | 0.003               |
| abdominal ultrasound                                                                                                         | 13 (7.2%)                 | 9 (5.6%)                                 | 5 (19%)                                     |                     |
| abdominal CT                                                                                                                 | 21 (11.6%)                | 16 (10%)                                 | 5 (23.8%)                                   |                     |
| abdominal MRI                                                                                                                | 0                         | 0                                        | 0                                           |                     |
| What is the next recommended step in the guidelines?                                                                         |                           |                                          |                                             |                     |
| appendectomy                                                                                                                 | 147 (81.2%)               | 135 (84.4%)                              | 12 (57.1%)                                  | 0.003               |
| abdominal imaging test                                                                                                       | 34 (18.8%)                | 25 (15.6%)                               | 9 (52.9%)                                   |                     |
| Based on your experience, what is the next step?                                                                             |                           |                                          |                                             |                     |
| appendectomy                                                                                                                 | 30 (16.6%)                | 28 (17.5%)                               | 2 (9.5%)                                    | 0.535               |
| abdominal ultrasound                                                                                                         | 111 (61.3%)               | 94 (58.8%)                               | 17 (81%)                                    |                     |
| abdominal CT                                                                                                                 | 40 (22.1%)                | 38 (23.8%)                               | 2 (9.5%)                                    |                     |
| abdominal MRI                                                                                                                | 0                         | 0                                        | 0                                           |                     |
| Based on your experience, what is the next step?                                                                             |                           |                                          |                                             |                     |
| appendectomy                                                                                                                 | 30 (16.6%)                | 28 (17.5%)                               | 2 (9.5%)                                    | 0.535               |
| abdominal imaging test                                                                                                       | 151 (83.4%)               | 132 (82.5%)                              | 19 (90.5%)                                  |                     |
| In case you chose an abdominal ultrasound, the test results are that the appendix wasn't visualized. What is your next step? |                           |                                          |                                             |                     |
| Appendectomy                                                                                                                 | 26 (20.2%)                | 24 (21.6%)                               | 2 (11.1%)                                   | 0.525               |
| abdominal CT                                                                                                                 | 103 (79.8%)               | 87 (78.4%)                               | 16 (88.9%)                                  |                     |
| abdominal MRI                                                                                                                | 0                         | 0                                        | 0                                           |                     |
| In case you chose to have an imagining scan as first step, what is the reason for that?                                      |                           |                                          |                                             |                     |
| literature recommendation                                                                                                    | 5 (2.8%)                  | 4 (2.5%)                                 | 1 (4.8%)                                    | 0.55                |
| common practice in my department                                                                                             | 96 (53%)                  | 87 (54.4%)                               | 9 (42.9%)                                   | 0.32                |
| anamnesis and physical examination are not unequivocal                                                                       | 16 (8.8%)                 | 11 (6.9%)                                | 5 (23.8%)                                   | 0.01                |
| necessity to "strengthen" the diagnostic findings before surgery                                                             | 69 (38.1%)                | 56 (35%)                                 | 13 (61.9%)                                  | 0.017               |
| fear of medical malpractice                                                                                                  | 47 (26%)                  | 42 (26.3%)                               | 5 (23.8%)                                   | 0.81                |
| patient expectation of a definite diagnosis                                                                                  | 55 (30.4%)                | 53 (33.1%)                               | 2 (9.5%)                                    | 0.027               |
